# Supplementary material for: Association between Glasgow Coma Scale in Early Carbon Monoxide Poisoning and Development of Delayed Neurological Sequelae: A Meta-Analysis
Source: MDPI journal article supplement (doi:10.3390/jpm12040635), 2022-04-14
Supplement: s1 [file s1]

## Supplementary Materials

**Table S1.** Search strategy.

| Medline                                                                                                                                                                                                                                                                                                                          |
|----------------------------------------------------------------------------------------------------------------------------------------------------------------------------------------------------------------------------------------------------------------------------------------------------------------------------------|
| #1. exp Carbon Monoxide OR exp Carbon Monoxide Poisoning OR carbon monoxide poisoning.ti,ab,kw OR carbon monoxide intoxication.ti,ab,kw OR CO poisoning.ti,ab,kw OR CO intoxication.ti,ab,kw                                                                                                                                     |
| #2. exp Cognition/ or exp Nervous System Diseases/ or exp Cognition Disorders/ OR exp Cognitive Dysfunction/ OR delayed neuropsychological sequelae.ti,ab,kw OR delayed neurological sequelae.ti,ab,kw OR DNS.ti,ab,kw                                                                                                           |
| #1 AND #2                                                                                                                                                                                                                                                                                                                        |
| Embase                                                                                                                                                                                                                                                                                                                           |
| #1. 'carbon monoxide'/exp OR 'carbon monoxide intoxication'/exp OR 'carbon monoxide':ab,kw,ti OR 'carbon monoxide intoxication':ab,kw,ti OR 'carbon monoxide poisoning':ab,kw,ti OR 'co poisoning':ab,kw,ti OR 'co intoxication':ab,kw,ti                                                                                        |
| #2. 'neurologic disease'/exp OR 'neuropsychology'/exp OR 'cognition'/exp OR 'cognitive defect'/exp OR 'delayed neurotoxicity'/exp OR 'neurologic disease'/exp OR 'neuropsychology'/exp OR 'cognition'/exp OR 'cognitive defect'/exp OR 'delayed neurotoxicity'/exp OR 'delayed neurological sequelae':ti,ab,kw OR 'dns':ti,ab,kw |
| #1 AND #2                                                                                                                                                                                                                                                                                                                        |
| Cochrane library                                                                                                                                                                                                                                                                                                                 |
| #1. Carbon Monoxide [MeSH] OR Carbon Monoxide [MeSH] OR carbon monoxide poisoning OR carbon monoxide intoxication                                                                                                                                                                                                                |
| #2. Congnition [MeSH] OR Nervous System Diseases [MeSH] OR Cognition Disorders [MeSH] OR delayed neurological sequelae OR delayed neuropsychological sequelae #1 AND #2                                                                                                                                                          |

**Table S2.** List of excluded references after full-text review.

| Title                                                                                                                                                                                      | First Author      | Journal (Year)                                | Main Reason for Exclusion                                    |
|--------------------------------------------------------------------------------------------------------------------------------------------------------------------------------------------|-------------------|-----------------------------------------------|--------------------------------------------------------------|
| Longitudinal gray matter changes of the pain matrix in patients with carbon monoxide intoxication: A voxel-based morphometry study                                                         | Chou et al.       | European Journal of Radiology (2020)          | Intervention was not intended for initial GCS                |
| S-100beta in predicting the need of hyperbaric oxygen in CO-induced delayed neurological sequels                                                                                           | Hafez et al. [14] | Human & Experimental Toxicology (2020)        | Intervention was not intended for initial GCS                |
| Predictive factors for acute brain lesions on magnetic resonance imaging in acute carbon monoxide poisoning                                                                                | Kim et al.        | American Journal of Emergency Medicine (2020) | Intervention was not intended for initial GCS                |
| Carbon monoxide poisoning-induced delayed encephalopathy accompanies decreased microglial cell numbers: Distinctive pathophysiological features from hypoxemia induced brain damage        | Sekiya et al. [4] | Brain Research (2019)                         | Animal study                                                 |
| Evaluation of changes in magnetic resonance diffusion tensor imaging after treatment of delayed encephalopathy due to carbon monoxide poisoning                                            | Wu et al.         | Journal of Integrative Neuroscience (2019)    | Intervention was not intended for initial GCS                |
| Gray matter nuclei damage in acute carbon monoxide intoxication assessed in vivo using diffusion tensor MR imaging                                                                         | Jiang et al.      | Radiologia Medica (2020)                      | Intervention was not intended for initial GCS                |
| Serum lactate as a predictor of neurologic outcome in ED patients with acute carbon monoxide poisoning                                                                                     | Jung et al.       | American Journal of Emergency Medicine (2019) | Outcome also included persistent neurological sequelae (PNS) |
| Cerebral Damage after Carbon Monoxide Poisoning: A Longitudinal Diffusional Kurtosis Imaging Study                                                                                         | Zhang et al. [7]  | American Journal of Neuro-radiology (2019)    | Intervention was not intended for initial GCS                |
| Acute Brain Lesions on Magnetic Resonance Imaging and Delayed Neurological Sequelae in Carbon Monoxide Poisoning                                                                           | Jeon et al. [21]  | JAMA Neurology (2018)                         | Intervention was not intended for initial GCS                |
| The impact of hyperthermia after acute carbon monoxide poisoning on neurological sequelae                                                                                                  | Moon et al.       | Human & Experimental Toxicology (2019)        | Outcome also included persistent neurological sequelae (PNS) |
| Clinical Predictors of Acute Brain Injury in Carbon Monoxide Poisoning Patients with Altered Mental Status at Admission to Emergency Department                                            | Kim et al.        | Academic Emergency Medicine (2019)            | Intervention was not intended for initial GCS                |
| Neuroprotective effect of ethanol in acute carbon monoxide intoxication: A retrospective study                                                                                             | Kim et al.        | Medicine (2018)                               | Intervention was not intended for initial GCS                |
| Serum neuron-specific enolase levels at presentation and long-term neurological sequelae after acute charcoal burning-induced carbon monoxide poisoning                                    | Moon et al.       | Clinical Toxicology (2018)                    | Intervention was not intended for initial GCS                |
| Neurotoxicity of carbon monoxide targets caudate mediated dopaminergic system                                                                                                              | Sun et al.        | Neurotoxicology (2018)                        | Intervention was not intended for initial GCS                |
| Serum N-terminal proBNP, not troponin I, at presentation predicts long-term neurologic outcome in acute charcoal-burning carbon monoxide intoxication                                      | Moon et al.       | Clinical Toxicology (2018)                    | DNS was not described                                        |
| The usefulness of diffusion weighted magnetic resonance imaging performed in the acute phase as an early predictor of delayed neuropsychiatric sequelae in acute carbon monoxide poisoning | Kim et al. [22]   | Human & Experimental Toxicology (2018)        | Intervention was not intended for initial GCS                |
| Initial diffusion-weighted MRI and long-term neurologic outcomes in charcoal-burning carbon monoxide poisoning                                                                             | Moon et al.       | Clinical Toxicology (2018)                    | Intervention was not intended for initial GCS                |
| Serum neuron-specific enolase as an early predictor of delayed neuropsychiatric sequelae in patients with acute carbon monoxide poisoning                                                  | Cha et al. [20]   | Human & Experimental Toxicology (2018)        | Intervention was not intended for initial GCS                |
| Efficacy of N-Butylphthalide and Hyperbaric Oxygen Therapy on Cognitive Dysfunction in Patients with Delayed Encephalopathy After Acute Carbon Monoxide Poisoning                          | Xiang et al.      | Medical Science Monitor (2017)                | Intervention was not intended for initial GCS                |

|                                                                                                                                                                                                          |                  |                                                      |                                                                          |
|----------------------------------------------------------------------------------------------------------------------------------------------------------------------------------------------------------|------------------|------------------------------------------------------|--------------------------------------------------------------------------|
| Combined application of dexamethasone and hyperbaric oxygen therapy yields better efficacy for patients with delayed encephalopathy after acute carbon monoxide poisoning                                | Xiang et al.     | Drug design, development & therapy (2017)            | Control groups were not eligible for comparison with intervention groups |
| MRI and clinical manifestations of delayed encephalopathy after carbon monoxide poisoning                                                                                                                | Wang et al.      | Pakistan Journal of Pharmaceutical Sciences (2016)   | Control groups were not eligible for comparison with intervention groups |
| Reversible Changes of Brain Perfusion SPECT for Carbon Monoxide Poisoning-Induced Severe Akinetic Mutism                                                                                                 | Chen et al.      | Clinical Nuclear Medicine (2016)                     | Control groups were not eligible for comparison with intervention groups |
| Increased Long-Term Risk of Dementia in Patients with Carbon Monoxide Poisoning: A Population-Based Study                                                                                                | Wong et al.      | Medicine (2016)                                      | DNS was not described.                                                   |
| Acute carbon monoxide poisoning in a regional hospital in Hong Kong: historical cohort study                                                                                                             | Chan et al.      | Hong Kong Medical Journal (2016)                     | Intervention was not intended for initial GCS                            |
| Altered white matter metabolism in delayed neurologic sequelae after carbon monoxide poisoning: A proton magnetic resonance spectroscopic study                                                          | Kuroda et al.    | Journal of the Neurological Sciences (2016)          | Intervention was not intended for initial GCS                            |
| Delayed visual disturbances in carbon monoxide poisoning: Identification and evaluation                                                                                                                  | Stabile et al.   | Undersea & Hyperbaric Medicine (2015)                | Intervention was not intended for initial GCS                            |
| Increased risk of Parkinson disease in patients with carbon monoxide intoxication: a population-based cohort study                                                                                       | Lai et al.       | Medicine (2015)                                      | Intervention was not intended for initial GCS                            |
| Cognitive severity-specific neuronal degenerative network in charcoal burning suicide-related carbon monoxide intoxication: a multimodality neuroimaging study in Taiwan                                 | Chen et al.      | Medicine (2015)                                      | Intervention was not intended for initial GCS                            |
| Novel clinical grading of delayed neurologic sequelae after carbon monoxide poisoning and factors associated with outcome                                                                                | Kuroda et al.    | Neurotoxicology (2015)                               | Intervention was not intended for initial GCS                            |
| Lack of pupil reflex and loss of consciousness predict 30-day neurological sequelae in patients with carbon monoxide poisoning                                                                           | Zou et al. [34]  | PLoS ONE (2015)                                      | Intervention was not intended for initial GCS                            |
| 18F-FP-(+)-DTBZ positron emission tomography detection of monoaminergic deficient network in patients with carbon monoxide related parkinsonism                                                          | Chang et al.     | European Journal of Neurology (2015)                 | Intervention was not intended for initial GCS                            |
| Neuropsychological performance in patients with carbon monoxide poisoning                                                                                                                                | Yeh et al.       | Applied Neuropsychology: Adult (2014)                | Intervention was not intended for initial GCS                            |
| Plasma copeptin as a predictor of intoxication severity and delayed neurological sequelae in acute carbon monoxide poisoning                                                                             | Pang et al. [35] | Peptides (2014)                                      | Intervention was not intended for initial GCS                            |
| A positive Babinski reflex predicts delayed neuropsychiatric sequelae in Chinese patients with carbon monoxide poisoning                                                                                 | Zou et al.       | BioMed Research International (2014)                 | Intervention was not intended for initial GCS                            |
| The impacts of acute carbon monoxide poisoning on the brain: Longitudinal clinical and 99mTc ethyl cysteinate brain SPECT characterization of patients with persistent and delayed neurological sequelae | Tsai et al.      | Clinical Neurology & Neurosurgery (2014)             | Intervention was not intended for initial GCS                            |
| The role of S100B protein, neuron-specific enolase, and glial fibrillary acidic protein in the evaluation of hypoxic brain injury in acute carbon monoxide poisoning                                     | Akdemir et al.   | Human & Experimental Toxicology (2014)               | DNS was not described                                                    |
| Predictors for delayed encephalopathy following acute carbon monoxide poisoning                                                                                                                          | Kudo et al. [16] | BMC Emergency Medicine (2014)                        | Intervention was not intended for initial GCS                            |
| A PARK2 polymorphism associated with delayed neuropsychological sequelae after carbon monoxide poisoning                                                                                                 | Liang et al.     | BMC Medical Genetics (2013)                          | Intervention was not intended for initial GCS                            |
| Neuroprotective effects of erythropoietin in patients with carbon monoxide poisoning                                                                                                                     | Pang et al.      | Journal of Biochemical & Molecular Toxicology (2013) | Intervention was not intended for initial GCS                            |

|                                                                                                                                                                               |                     |                                                                 |                                               |
|-------------------------------------------------------------------------------------------------------------------------------------------------------------------------------|---------------------|-----------------------------------------------------------------|-----------------------------------------------|
| Diffusion tensor imaging for predicting the clinical outcome of delayed encephalopathy of acute carbon monoxide poisoning                                                     | Hou et al.          | European Neurology (2013)                                       | Intervention was not intended for initial GCS |
| Detection of gray matter damage using brain MRI and SPECT in carbon monoxide intoxication: a comparison study with neuropsychological correlation                             | Chen et al.         | Clinical Nuclear Medicine (2013)                                | Intervention was not intended for initial GCS |
| Diffusion-weighted imaging improves prediction in cognitive outcome and clinical phases in patients with carbon monoxide intoxication                                         | Chen et al.         | Neuroradiology (2013)                                           | Intervention was not intended for initial GCS |
| Delayed parkinsonism after CO intoxication: evaluation of the substantia nigra with inversion recovery MR imaging                                                             | Kao et al.          | Radiology (2012)                                                | Intervention was not intended for initial GCS |
| The usefulness of the serum s100b protein for predicting delayed neurological sequelae in acute carbon monoxide poisoning                                                     | Park et al. [15]    | Clinical Toxicology (2012)                                      | Intervention was not intended for initial GCS |
| Striatal dopamine transporter binding for predicting the development of delayed neuropsychological sequelae in suicide attempters by carbon monoxide poisoning: A SPECT study | Yang et al.         | Psychiatry Research (2011)                                      | Intervention was not intended for initial GCS |
| Neuropsychiatric disorders and risk factors in carbon monoxide intoxication                                                                                                   | Katirci et al.      | Toxicology & Industrial Health (2011)                           | DNS was not described                         |
| Factors affecting the prognosis of patients with delayed encephalopathy after acute carbon monoxide poisoning                                                                 | Hu et al.           | American Journal of Emergency Medicine (2011)                   | Intervention was not intended for initial GCS |
| Predictors of carbon monoxide poisoning-induced delayed neuropsychological sequelae                                                                                           | Ku et al.           | General Hospital Psychiatry (2010)                              | Intervention was not intended for initial GCS |
| Hyperbaric oxygen ameliorates delayed neuropsychiatric syndrome of carbon monoxide poisoning                                                                                  | Chang et al.        | Undersea & Hyperbaric Medicine (2010)                           | Intervention was not intended for initial GCS |
| Longitudinal study of carbon monoxide intoxication by diffusion tensor imaging with neuropsychiatric correlation                                                              | Chang et al.        | Journal of Psychiatry & Neuroscience (2010)                     | Intervention was not intended for initial GCS |
| Assessment of damage to cerebral white matter fiber in the subacute phase after carbon monoxide poisoning using fractional anisotropy in diffusion tensor imaging             | Beppu et al.        | Neuroradiology (2010)                                           | Intervention was not intended for initial GCS |
| S-100beta and neuron-specific enolase levels in carbon monoxide-related brain injury                                                                                          | Cakir et al.        | American Journal of Emergency Medicine (2010)                   | DNS was not described                         |
| The early elevation of interleukin 6 concentration in cerebrospinal fluid and delayed encephalopathy of carbon monoxide poisoning                                             | Ide et al.          | American Journal of Emergency Medicine (2009)                   | Control groups were not eligible              |
| Elevated serum S100B protein and neuron-specific enolase levels in carbon monoxide poisoning                                                                                  | Yardan et al.       | American Journal of Emergency Medicine (2009)                   | DNS was not described                         |
| Damage of white matter tract correlated with neuropsychological deficits in carbon monoxide intoxication after hyperbaric oxygen therapy                                      | Chang et al.        | Journal of Neurotrauma (2009)                                   | Intervention was not intended for initial GCS |
| Myelin basic protein in cerebrospinal fluid: a predictive marker of delayed encephalopathy from carbon monoxide poisoning                                                     | Ide et al.          | American Journal of Emergency Medicine (2008)                   | Control groups were not eligible              |
| Cognitive and affective outcomes of more severe compared to less severe carbon monoxide poisoning                                                                             | Chambers et al. [8] | Brain Injury (2008)                                             | Intervention was not intended for initial GCS |
| Carbon monoxide poisoning: risk factors for cognitive sequelae and the role of hyperbaric oxygen                                                                              | Weaver et al. [5]   | American Journal of Respiratory & Critical Care Medicine (2007) | Intervention was not intended for initial GCS |
| Delayed encephalopathy after carbon monoxide intoxication-long-term prognosis and correlation of clinical manifestations and neuroimages                                      | Hsiao et al.        | Acta Neurologica Taiwanica (2004)                               | Intervention was not intended for initial GCS |
| S100B protein in carbon monoxide poisoning: a pilot study                                                                                                                     | Brvar et al.        | Resuscitation (2004)                                            | Intervention was not intended for initial GCS |
| Diffusion-weighted MRI and 99mTc-HMPAO SPECT in delayed relapsing type of carbon monoxide poisoning: evidence of delayed cytotoxic edema                                      | Chu et al.          | European Neurology (2004)                                       | Intervention was not intended for initial GCS |

|                                                                                                                                                                                         |                  |                                                                |                                               |
|-----------------------------------------------------------------------------------------------------------------------------------------------------------------------------------------|------------------|----------------------------------------------------------------|-----------------------------------------------|
| Memory one month after acute carbon monoxide intoxication: a prospective study                                                                                                          | Deschamps et al. | Occupational & Environmental Medicine (2003)                   | Intervention was not intended for initial GCS |
| Parkinsonism after carbon monoxide poisoning                                                                                                                                            | Choi et al.      | European Neurology (2002)                                      | Intervention was not intended for initial GCS |
| White matter hyperintensities and neuropsychological outcome following carbon monoxide poisoning                                                                                        | Parkinson et al. | Neurology (2002)                                               | Intervention was not intended for initial GCS |
| Verbal memory deficits associated with fornix atrophy in carbon monoxide poisoning                                                                                                      | Kesler et al.    | Journal of the International Neuropsychological Society (2001) | Intervention was not intended for initial GCS |
| Severe carbon monoxide poisoning: outcome after hyperbaric oxygen therapy                                                                                                               | Hawkins et al.   | British Journal of Anaesthesia (2000)                          | DNS was not described.                        |
| The magnetic resonance imaging appearances of the brain in acute carbon monoxide poisoning                                                                                              | O'Donnell et al. | Clinical Radiology (2000)                                      | DNS was not described.                        |
| Clinical outcome and magnetic resonance imaging of carbon monoxide intoxication. A long-term follow-up study                                                                            | Pavese et al.    | Italian Journal of Neurological Sciences (1999)                | Intervention was not intended for initial GCS |
| Delayed movement disorders after carbon monoxide poisoning                                                                                                                              | Choi et al.      | European Neurology (1999)                                      | Intervention was not intended for initial GCS |
| Regional cerebral blood flow measurements with Xenon-CT in the prediction of delayed encephalopathy after carbon monoxide intoxication                                                  | Sesay et al.     | Acta Neurologica Scandinavica (1996)                           | Intervention was not intended for initial GCS |
| Delayed neuropsychologic sequelae after carbon monoxide poisoning: prevention by treatment with hyperbaric oxygen                                                                       | Thom et al.      | Annals of Emergency Medicine (1995)                            | Intervention was not intended for initial GCS |
| Evaluation of outcome of delayed neurologic sequelae after carbon monoxide poisoning by technetium-99m hexamethylpropylene amine oxime brain single photon emission computed tomography | Choi et al.      | European Neurology (1995)                                      | Intervention was not intended for initial GCS |
| Computed tomographic findings after acute carbon monoxide poisoning                                                                                                                     | Jones et al.     | American Journal of Emergency Medicine (1994)                  | DNS was not described.                        |
| Neurological sequelae following carbon monoxide poisoning clinical course and outcome according to the clinical types and brain computed tomography scan findings                       | Lee et al.       | Movement Disorders (1994)                                      | Intervention was not intended for initial GCS |
| Technetium-99m HM-PAO SPECT in patients with delayed neurologic sequelae after carbon monoxide poisoning                                                                                | Choi et al.      | Journal of Korean Medical Science (1992)                       | Intervention was not intended for initial GCS |
| A brain syndrome associated with delayed neuropsychiatric sequelae following acute carbon monoxide intoxication                                                                         | Min et al.       | Acta Psychiatrica Scandinavica (1986)                          | Intervention was not intended for initial GCS |
| Delayed neurologic sequelae in carbon monoxide intoxication                                                                                                                             | Choi . [11]      | Archives of Neurology (1983)                                   | Intervention was not intended for initial GCS |
| Mechanism of delayed encephalopathy after acute carbon monoxide poisoning                                                                                                               | Huang et al.     | Neural Regeneration Research (2020)                            | Animal study                                  |
| Glasgow Coma Scale is a better delayed neurological sequelae risk factor than neurological examination abnormalities in carbon monoxide poisoning                                       | Xu et al.        | American Journal of Emergency Medicine (2020)                  | Intervention was not intended for initial GCS |
| Cerebral White Matter Lesions on Diffusion-Weighted Images and Delayed Neurological Sequelae after Carbon Monoxide Poisoning: A Prospective Observational Study                         | Nah et al. [23]  | Diagnostics (2020)                                             | Intervention was not intended for initial GCS |
| Selective Susceptibility of Oligodendrocytes to Carbon Monoxide Poisoning: Implication for Delayed Neurologic Sequelae (DNS)                                                            | Tian et al.      | Frontiers in Psychiatry (2020)                                 | Control groups were not eligible              |
| Study on brain structure network of patients with delayed encephalopathy after carbon monoxide poisoning: based on diffusion tensor imaging                                             | Jiang et al.     | Nuoradiology (2020)                                            | Intervention was not intended for initial GCS |
| Abnormal degree centrality in delayed encephalopathy after carbon monoxide poisoning: a resting-state fMRI study                                                                        | Wu et al.        | Neuroradiology (2020)                                          | Intervention was not intended for initial GCS |
| The Cannabinoid WIN 55,212-2 Reduces Delayed Neurologic Sequelae After Carbon Monoxide Poisoning by Promoting Microglial M2 Polarization Through ST2 Signaling                          | Du et al.        | Journal of Molecular Neuroscience (2020)                       | Animal study                                  |

|                                                                                                                                                                                                     |                      |                                                              |                                                                          |
|-----------------------------------------------------------------------------------------------------------------------------------------------------------------------------------------------------|----------------------|--------------------------------------------------------------|--------------------------------------------------------------------------|
| Oligodendrocyte dysfunction and regeneration failure: A novel hypothesis of delayed encephalopathy after carbon monoxide poisoning                                                                  | Guo et al.           | Medical Hypotheses (2020)                                    | Control groups were not eligible                                         |
| The efficacy of N-butylphthalide and dexamethasone combined with hyperbaric oxygen on delayed encephalopathy after acute carbon monoxide poisoning                                                  | Zhang et al.         | Drug Design, Development and Therapy (2020)                  | Intervention was not intended for initial GCS                            |
| Serum netrin-1 levels at presentation and delayed neurological sequelae in unintentional carbon monoxide poisoning                                                                                  | Kokulu et al.        | Clinical Toxicology (2020)                                   | Intervention was not intended for initial GCS                            |
| Assessment of serum glucose/potassium ratio as a predictor for delayed neuropsychiatric syndrome of carbon monoxide poisoning                                                                       | Demirtaş et al.      | Human and Experimental Toxicology (2020)                     | Intervention was not intended for initial GCS                            |
| Multicenter retrospective analysis of the risk factors for delayed neurological sequelae after acute carbon monoxide poisoning                                                                      | Zhang et al.         | American Journal of Emergency Medicine (2020)                | Intervention was not intended for initial GCS                            |
| Association between Neuron-Specific Enolase Gene Polymorphism and Delayed Encephalopathy after Acute Carbon Monoxide Poisoning                                                                      | Xu et al.            | Behavioural Neurology (2020)                                 | Intervention was not intended for initial GCS                            |
| Hyperbaric Oxygen Therapy Did Not Prevent Delayed Neuropsychiatric Sequelae in a Prospective Observational Study with Propensity Score Matching in 224 Patients With Acute Carbon Monoxide Toxicity | Han et al.           | Journal of Emergency Medicine (2020)                         | Intervention was not intended for initial GCS                            |
| LRCH1 polymorphisms linked to delayed encephalopathy after acute carbon monoxide poisoning identified by GWAS analysis followed by Sequenom MassARRAY® validation                                   | Gu et al.            | BMC Medical Genetics (2019)                                  | Intervention was not intended for initial GCS                            |
| Utility of brain CT for predicting delayed encephalopathy after acute carbon monoxide poisoning                                                                                                     | Du et al. [39]       | Experimental and Therapeutic Medicine (2019)                 | Intervention was not intended for initial GCS                            |
| Longitudinal white matter changes following carbon monoxide poisoning: A 9-month follow-up voxelwise diffusional kurtosis imaging study                                                             | Chou et al.          | American Journal of Neuroradiology (2019)                    | Intervention was not intended for initial GCS                            |
| Demographic characteristics and delayed neurological sequelae risk factors in carbon monoxide poisoning                                                                                             | Sarı Doğan et al.    | American Journal of Emergency Medicine (2019)                | Intervention was not intended for initial GCS                            |
| Impact of hyperbaric oxygen therapy on subsequent neurological sequelae following carbon monoxide poisoning                                                                                         | Huang et al.         | Journal of Clinical Medicine (2018)                          | Intervention was not intended for initial GCS                            |
| Diffusion kurtosis imaging as a neuroimaging biomarker in patients with carbon monoxide intoxication                                                                                                | Lee et al.           | NeuroToxicology (2018)                                       | Intervention was not intended for initial GCS                            |
| Dynamic changes and clinical significance of serum S100B protein and glial fibrillary acidic protein in patients with delayed encephalopathy after acute carbon monoxide poisoning                  | Di et al.            | Pakistan Journal of Medical Sciences (2018)                  | Intervention was not intended for initial GCS                            |
| Efficacy of combined glucocorticoid and hyperbaric oxygen therapy against delayed encephalopathy after carbon monoxide poisoning, and its effect on expression of immune-associated cytokines       | Li et al.            | Tropical Journal of Pharmaceutical Research (2018)           | Control groups were not eligible for comparison with intervention groups |
| Clinical features and risk factors analysis of delayed encephalopathy after acute carbon monoxide poisoning                                                                                         | Tianhong et al.      | Acta Medica Mediterranea (2018)                              | Intervention was not intended for initial GCS                            |
| Variability in Treatment for Carbon Monoxide Poisoning in Japan: A Multicenter Retrospective Survey                                                                                                 | Fujita et al.        | Emergency Medicine International (2018)                      | DNS was not described                                                    |
| Copeptin levels in carbon monoxide poisoning                                                                                                                                                        | İrem et al.          | Turkish Journal of Medical Sciences (2017)                   | DNS was not described                                                    |
| Efficacy of Combined XingZhi-YiNao Granules and Hyperbaric Oxygen Therapy for Cognition and Motor Dysfunction in Patients with Delayed Encephalopathy after Acute Carbon Monoxide Poisoning         | Qin et al.           | Evidence-based Complementary and Alternative Medicine (2017) | Intervention was not intended for initial GCS                            |
| Risk factors for the delayed onset of neuropsychologic sequelae following carbon monoxide poisoning                                                                                                 | Kitamoto et al. [18] | Acute Medicine and Surgery (2016)                            | Intervention was not intended for initial GCS<br>Creatinine kinase       |

|                                                                                                                                                                       |                 |                                                                    |                                                                                   |
|-----------------------------------------------------------------------------------------------------------------------------------------------------------------------|-----------------|--------------------------------------------------------------------|-----------------------------------------------------------------------------------|
| Lp-PLA2 variants associated with delayed encephalopathy after acute carbon monoxide poisoning                                                                         | Zhao et al.     | International Journal of Clinical and Experimental Medicine (2016) | Intervention was not intended for initial GCS                                     |
| Metabolic Covariant Network in Relation to Nigrostriatal Degeneration in Carbon Monoxide Intoxication-Related Parkinsonism                                            | Chang et al.    | Frontiers in Neuroscience (2016)                                   | Intervention was not intended for initial GCS                                     |
| Ischemia-modified albumin levels in the prediction of acute critical neurological findings in carbon monoxide poisoning                                               | Daş et al.      | Kaohsiung Journal of Medical Sciences (2016)                       | DNS was not described                                                             |
| Can initial lactate levels predict the severity of unintentional carbon monoxide poisoning?                                                                           | Doğan et al.    | Human and Experimental Toxicology (2015)                           | Intervention was not intended for initial GCS                                     |
| Predicting poor outcome in patients with intentional carbon monoxide poisoning and acute respiratory failure: A retrospective study                                   | Shen et al.     | Journal of Medical Sciences (Taiwan) (2015)                        | Outcome also included persistent neurological sequelae (PNS)                      |
| Increased risk of Parkinson disease in patients with carbon monoxide intoxication                                                                                     | Lai et al.      | Medicine (United States) (2015)                                    | Control groups were not eligible for comparison with intervention groups          |
| Neuropsychological outcome after carbon monoxide exposure following a storm: A case-control study                                                                     | Pages et al.    | BMC Neurology (2014)                                               | Control groups were not eligible for comparison with intervention groups          |
| Detecting damaged regions of cerebral white matter in the subacute phase after carbon monoxide poisoning using voxel-based analysis with diffusion tensor imaging     | Fujiwara et al. | Neuroradiology (2012)                                              | Outcome also included persistent neurological sequelae (PNS)                      |
| Elevated S100B level in cerebrospinal fluid could predict poor outcome of carbon monoxide poisoning                                                                   | Ide et al.      | American Journal of Emergency Medicine (2012)                      | Intervention was not intended for initial GCS                                     |
| The value of initial lactate in patients with carbon monoxide intoxication: In the emergency department                                                               | Moon et al.     | Human and Experimental Toxicology (2011)                           | Intervention was not intended for initial GCS                                     |
| Hydrogen-rich saline reduces delayed neurologic sequelae in experimental carbon monoxide toxicity                                                                     | Sun et al.      | Critical Care Medicine (2011)                                      | Animal study                                                                      |
| Tc99m-sestamibi thigh SPECT/CT images for noninvasive assessment of skeletal muscle injury in carbon monoxide intoxication with clinical and pathological correlation | Huang et al.    | Clinical Nuclear Medicine (2011)                                   | Control groups were not eligible for comparison with intervention groups          |
| Clinical significance of the pallidoreticular pathway in patients with carbon monoxide intoxication                                                                   | Chang et al.    | Brain (2011)                                                       | Control groups were not eligible for comparison with intervention groups          |
| White matter damage in carbon monoxide intoxication assessed in vivo using diffusion tensor MR imaging                                                                | Lin et al.      | American Journal of Neuroradiology (2009)                          | Control groups were not eligible for comparison with intervention groups.         |
| Comparison of SPECT findings and neuropsychological sequelae in carbon monoxide and organophosphate poisoning                                                         | Ozyurt et al.   | Clinical Toxicology (2008)                                         | Control groups were not eligible for comparison with intervention groups          |
| Affective outcome following carbon monoxide poisoning: A prospective longitudinal study                                                                               | Jasper et al.   | Cognitive and Behavioral Neurology (2005)                          | DNS was not described.                                                            |
| Is elevated plasma lactate a useful marker in the evaluation of pure carbon monoxide poisoning?                                                                       | Benaissa et al. | Intensive Care Medicine (2003)                                     | Intervention was not intended for initial GCS                                     |
| Quantitative PET scan findings in carbon monoxide poisoning: Deficits seen in a matched pair                                                                          | Pinkston et al. | Archives of Clinical Neuropsychology (2000)                        | Intervention was not intended for initial GCS                                     |
| A long-term follow-up study of serial magnetic resonance images in patients with delayed encephalopathy after acute carbon monoxide poisoning                         | Inagaki et al.  | Psychiatry and Clinical Neurosciences (1997)                       | Intervention was not intended for initial GCS comparison with intervention groups |

|                                                                                                                  |               |                                                                       |                                               |
|------------------------------------------------------------------------------------------------------------------|---------------|-----------------------------------------------------------------------|-----------------------------------------------|
| Computed tomography of the brain in acute carbon monoxide poisoning                                              | Silver et al. | Clinical Radiology (1996)                                             | Intervention was not intended for initial GCS |
| A longitudinal study of 100 consecutive admissions for carbon monoxide poisoning to the Royal Adelaide Hospital  | Gorman et al. | Anaesthesia and Intensive Care (1992)                                 | DNS was not described                         |
| Hematological parameters as early predictors of delayed neurological sequelae in acute carbon monoxide poisoning | Shahin et al. | Ain Shams Journal of Forensic Medicine and Clinical Toxicology (2020) | Intervention was not intended for initial GCS |

Acronyms: CO, carbon monoxide; GCS, Glasgow coma scale; DNS, delayed neurologic sequelae.

Table S3. Egger's regression test for publication bias.

| Statistic    | Intercept | Confidence Interval | T    | p-value |
|--------------|-----------|---------------------|------|---------|
| Egger's test | 1.1558    | (-0.4190)–2.7306    | 1.44 | 0.1883  |

|               | Study participation | Study attrition | Prognostic factor measurement | Outcome measurement | Study confounding | Statistical analysis and reporting |
|---------------|---------------------|-----------------|-------------------------------|---------------------|-------------------|------------------------------------|
| Beppu 2011    | ?                   | -               | +                             | +                   | -                 | +                                  |
| Beppu 2013    | ?                   | -               | +                             | +                   | -                 | +                                  |
| Gaballah 2020 | ?                   | ?               | +                             | +                   | -                 | +                                  |
| Han 2021      | +                   | -               | +                             | +                   | +                 | +                                  |
| Huang 2019    | ?                   | -               | +                             | +                   | +                 | +                                  |
| Lee 2020      | +                   | -               | +                             | +                   | +                 | +                                  |
| Liao 2018     | ?                   | -               | +                             | +                   | +                 | +                                  |
| Liao 2019     | ?                   | -               | +                             | +                   | -                 | +                                  |
| Lin 2018      | +                   | ?               | +                             | +                   | +                 | +                                  |
| Pepe 2011     | +                   | -               | +                             | +                   | +                 | +                                  |

Figure S1. Risk of bias and quality assessment of included studies by the QUIPS tool. +, low; -, high; ?, unclear. [1,6,9,17,19,25,30–33].



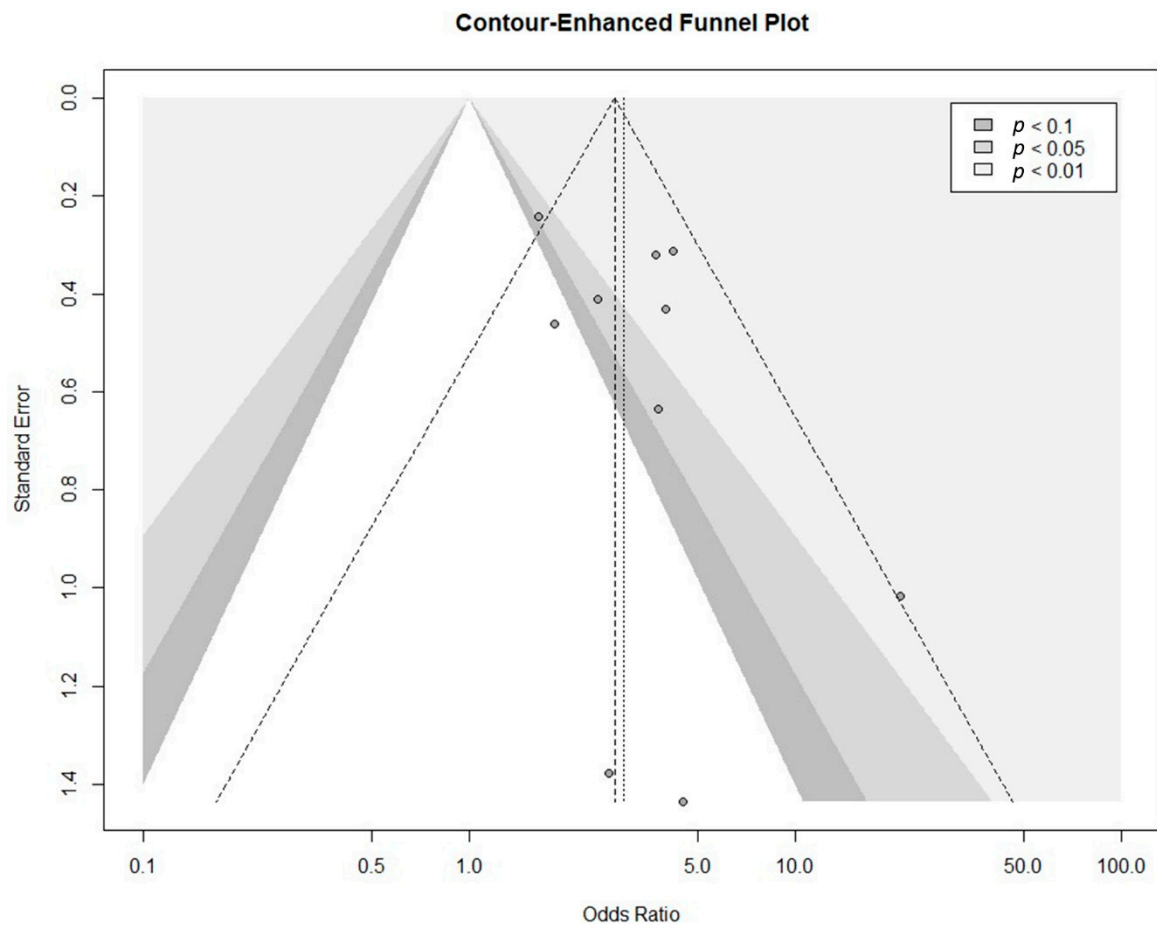

**Figure S2.** Funnel plot for publication bias.
